# Supplementary material for: Olive Leaf as a Source of Antibacterial Compounds Active against Antibiotic-Resistant Strains of Campylobacter jejuni and Campylobacter coli
Source: MDPI journal article supplement (doi:10.3390/antibiotics12010026), 2022-12-24
Supplement: s1 [file s1]

**Supplementary Table (S1).** Ultraviolet absorption, mass spectrometric data of main phenolic and secoiridoid compounds present in olive-leaf extracts (E1 and E2).

| Compounds                                                         | Abs <sub>max</sub><br>(nm) | [M + H] <sup>+</sup><br>(m/z)      | [M – H]<br>(m/z) | Productions (-)<br>(m/z)                                         |
|-------------------------------------------------------------------|----------------------------|------------------------------------|------------------|------------------------------------------------------------------|
| <b>Phenylethanols and glycosides</b>                              |                            |                                    |                  |                                                                  |
| 3,4-DHPE (Hydroxytyrosol)                                         | 234/278                    | 161.2 [M+Na] <sup>+</sup><br>139.0 | 153.1            | 305.2 <sup>+</sup> ; 123.2                                       |
| + 3,4-DHPE glucoside 1                                            |                            |                                    | 315.1            | 153.1 ; 123.2                                                    |
| 3,4-DHPE glucoside 2 + 3                                          | 230/278                    |                                    | 315.0            | 153.1                                                            |
| 4-HPE (Tyrosol)                                                   | 232/275                    |                                    |                  |                                                                  |
| 3,4-DHPG                                                          | 232/278                    |                                    | 169.0            |                                                                  |
| <b>Secoiridoids</b>                                               |                            |                                    |                  |                                                                  |
| EA 2-glucoside (Oleoside 11-methyl ester)                         | 238                        |                                    | 403.1            | 807.2 <sup>+</sup> ; 223.1 ;<br>179.0 ; 119.1 ; 112.9            |
| EMA 2-glucoside (Secoxyloganin)                                   | 237                        |                                    | 403.0            | 807.2 <sup>+</sup> ; 223.1 ;<br>179.1 ; 121.1 ;<br>119.2 ; 113.1 |
| EA (Elenolic acid)                                                | 239                        |                                    | 241.1            | 165.1 ; 139.1 ;<br>127.1 ; 121.1 ;<br>111.2 ; 101.0              |
| <b>Flavones</b>                                                   |                            |                                    |                  |                                                                  |
| Luteolin 7- <i>O</i> -glucoside                                   | 254/268sh/348              | 449.1                              | 447.1            | 895.0 <sup>+</sup>                                               |
| Luteolin 4'-methyl ether 7- <i>O</i> -glucoside (Diosmin)         | 252/266/347                | 609.2                              | 606.9            | 461.0 ; 299.1                                                    |
| Apigenin 7- <i>O</i> -rutinoside (Isorhoifolin)                   | 266/341                    | 579.1                              | 576.8            |                                                                  |
| Apigenin 7- <i>O</i> -glucuronide                                 | 266/338                    |                                    | 445.1            |                                                                  |
| Luteolin 3',7-di- <i>O</i> -glucoside                             | 267/342                    |                                    | 609.1            |                                                                  |
| Apigenin 6,8-di- <i>C</i> -glucoside                              | 254/265sh/348              | 595.2                              |                  |                                                                  |
| Luteolin                                                          | 253/265/348                | 287.0                              | 285.1            | 284.1                                                            |
| <b>Secoiridoid phenylethanols</b>                                 |                            |                                    |                  |                                                                  |
| 3,4-DHPE-EA glucoside (Oleuropein)                                | 234/280                    | 563.2 [M+Na] <sup>+</sup>          | 539.2            |                                                                  |
| 4-HPE-EA-glucoside (Ligustroside)                                 | 234/280                    |                                    | 523.0            |                                                                  |
| <b>Hydroxycinnamic acids and derivatives</b>                      |                            |                                    |                  |                                                                  |
| <i>trans</i> -4-HCA ( <i>trans</i> -4-coumaric acid)              | 233/296sh/308              |                                    | 163.0            | 145.0 ; 123.1 ; 119.1                                            |
| <i>trans</i> -3,4-DHCA ( <i>trans</i> -caffeic acid)              | 234/296sh/322              | 181.0                              | 179.0            | 135.1                                                            |
| <i>trans</i> -3-M,4-HCA ( <i>trans</i> -ferulic acid)             | 236/295sh/322              |                                    | 193.1            | 178.1 ; 149.0                                                    |
| <i>trans</i> -4,5-DCQA ( <i>trans</i> -4,5-dicaffeoylquinic acid) | 235/300sh/326              | 517.1                              |                  |                                                                  |
| <b>Cymamoyl phenylethanol glycosides</b>                          |                            |                                    |                  |                                                                  |
| 3,4-DHPE caffeoyl glucoside (Verbascoside)                        | 234/285sh/330              | 647.2 [M+Na] <sup>+</sup>          | 623.2            |                                                                  |
| <b>Hydroxybenzoic acids and glycosides</b>                        |                            |                                    |                  |                                                                  |
| 3,4-DHBA (Protocatechuic acid)                                    | 260/294                    |                                    | 153.0            | 123.1 ; 109.0                                                    |
| 3,4-DHBA glucoside                                                | 253/293                    |                                    | 314.9            | 153.0 ; 136.9                                                    |
| <b>Flavonols</b>                                                  |                            |                                    |                  |                                                                  |
| Quercetin 3- <i>O</i> -glucoside (Isoquercitrin)                  | 233/281/322                | 465.1                              | 463.1            |                                                                  |
| Quercetin 3-rhamnoside (Quercitrin)                               | 253/295sh/342              | 449.1                              | 447.1            |                                                                  |
| Quercetin                                                         | 254/300sh/370              | 303.0                              |                  |                                                                  |
| <b>Flavanones</b>                                                 |                            |                                    |                  |                                                                  |
| Eriodictyol 7- <i>O</i> -rutinoside                               | 233/283/328                |                                    | 594.6            | 449.1 ; 286.9 ; 151.3                                            |
| Eriodictyol 7- <i>O</i> -glucoside                                | 232/277/340                | 451.1                              | 449.1            |                                                                  |

sh: peak shoulder; DHBA: dihydroxybenzoic acid; DHCA: dihydroxycinnamic acid; HCA: hydroxycinnamic acid; 3-M,4-HCA: 3-Methoxy-4-hydroxycinnamic acid; DCQA: dicaffeoylquinic acid; DHPG: 3,4-dihydroxyphenylglycol; DHPE: dihydroxyphenylethanol; HPE: hydroxyphenylethanol; EA: Elenolic acid; EMA 2-glucoside: EA monoaldehyde isomer 2-glucoside. <sup>+</sup> Double-charged ion [M-2H]<sup>2-</sup>.
